# Supplementary material for: The ability of biomarkers to assess the severity of atopic dermatitis
Source: PubMed Central journal article supplement (PMC10616407; doi:10.1016/j.jacig.2023.100175), 2023-09-27
Supplement: mmc2.pdf [file mmc2.pdf]

**Table S1 Baseline characteristics of the subjects**

|                                       | n=110    |           |
|---------------------------------------|----------|-----------|
| Men, n (%)                            | 74       | (67.3)    |
| Age (y), mean (SD)                    | 40.3     | (12.5)    |
| Biomarker                             |          |           |
| LDH (U/L)                             | 264.8    | (73.4)    |
| Eosinophils (/ $\mu$ L)               | 586.5    | (506.9)   |
| Total IgE (IU/mL)                     | 11091.9  | (9082.4)  |
| SolubleIL-2R (U/mL)                   | 416.7    | (201.3)   |
| CCL17/TARC (pg/mL)                    | 2823.1   | (4306.4)  |
| CCL22/MDC (pg/mL)                     | 1424.9   | (1006.8)  |
| CCL26/Eotaxin-3 (pg/mL)               | 43.1     | (39.4)    |
| IL-13 (pg/mL)                         | 0.3      | (0.2)     |
| IL-22 (pg/mL)                         | 8.5      | (15.6)    |
| CCL27/CTACK (pg/mL)                   | 1087.2   | (417.7)   |
| CCL18/MIP-4/PARC (pg/mL)              | 127461.1 | (99681.4) |
| ET1 (pg/mL)                           | 1.1      | (0.4)     |
| Periostin (ng/mL)                     | 103.7    | (52.2)    |
| SCCA2 (ng/mL)                         | 8.3      | (14.7)    |
| Outcome                               |          |           |
| EASI score, mean (SD)                 | 26.6     | (9.9)     |
| POEM score, mean (SD)                 | 18.2     | (6.9)     |
| pruritus-NRS, mean (SD)               | 6.5      | (2.3)     |
| uncomfortable skin-NRS, mean (SD)     | 6.3      | (2.7)     |
| treatment satisfaction-NRS, mean (SD) | 5.1      | (2.7)     |

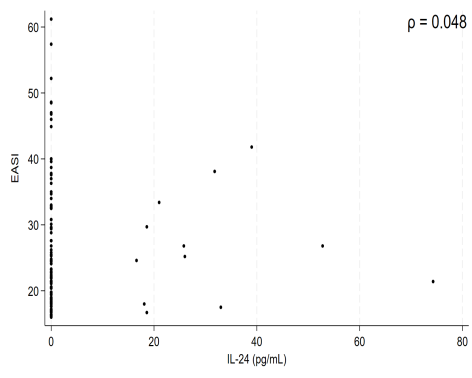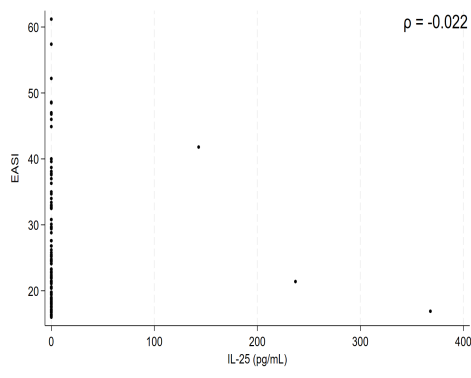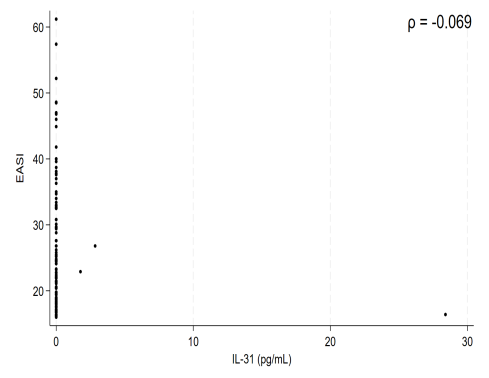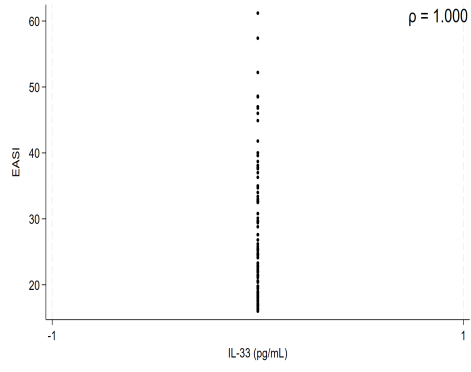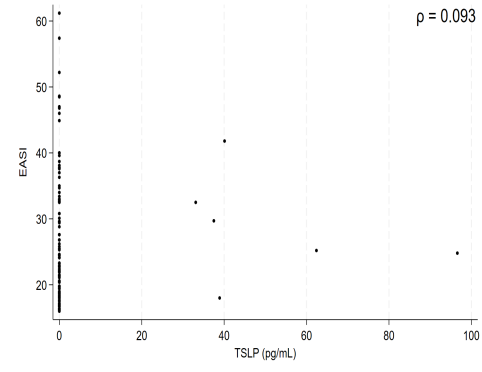

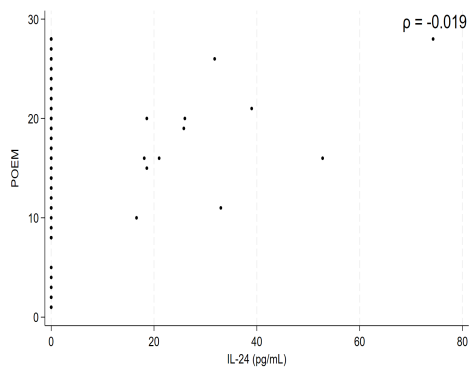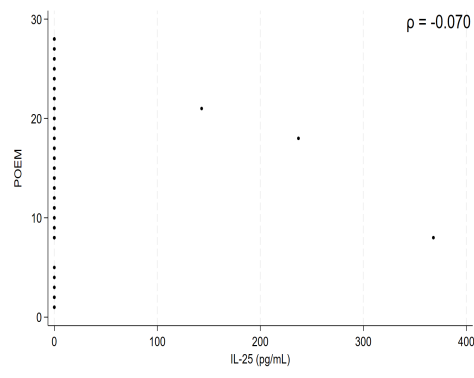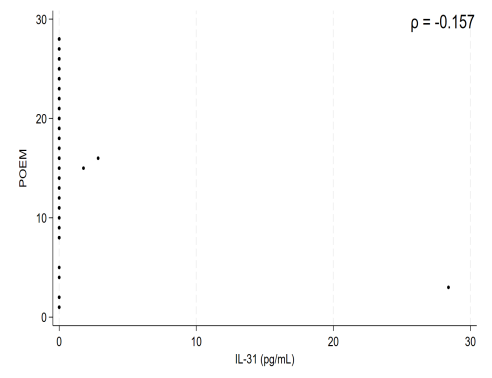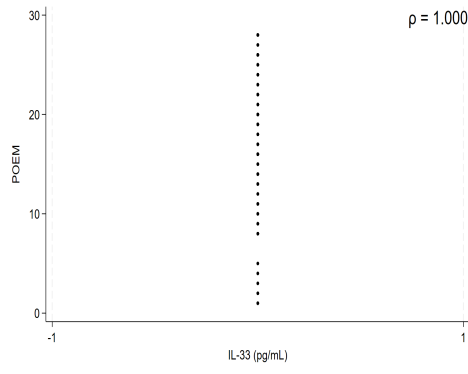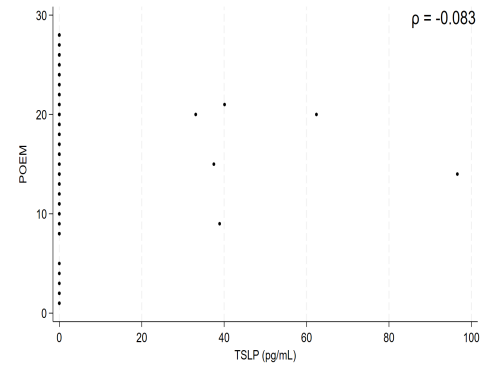

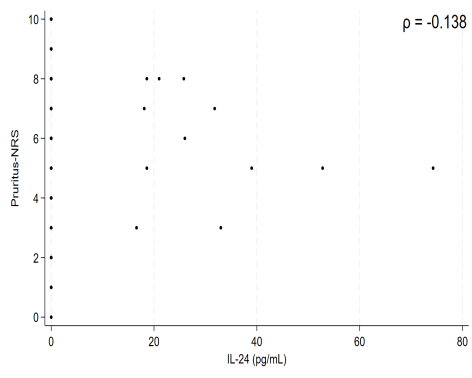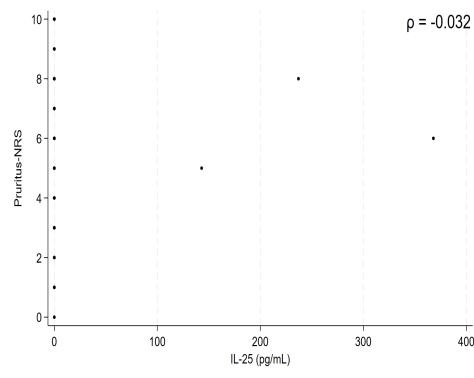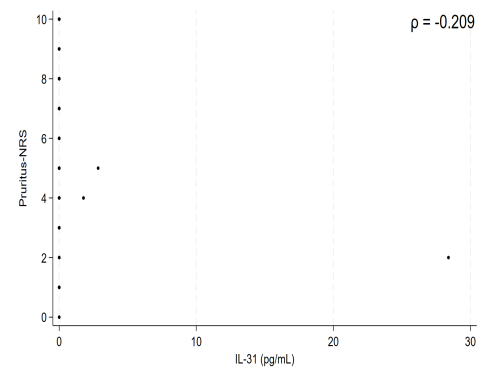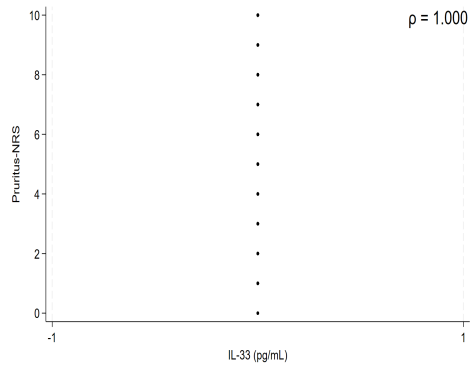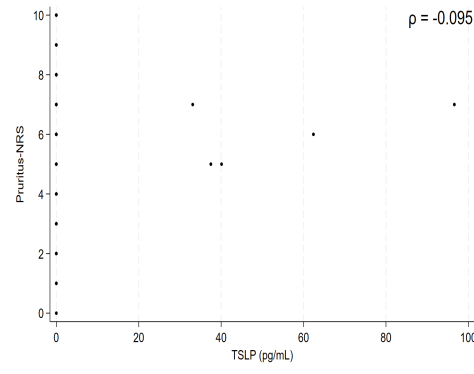

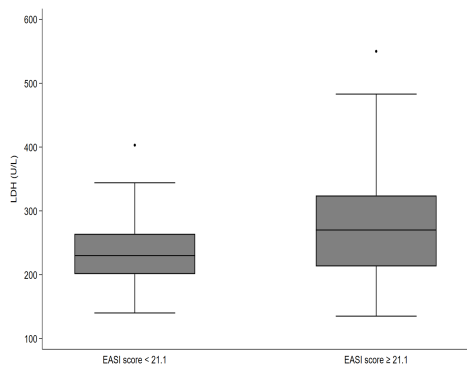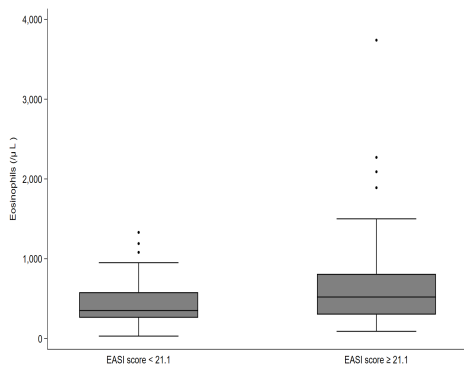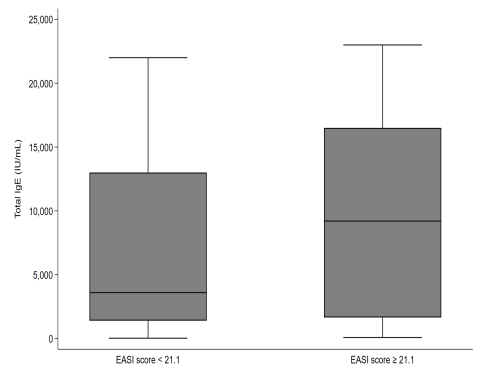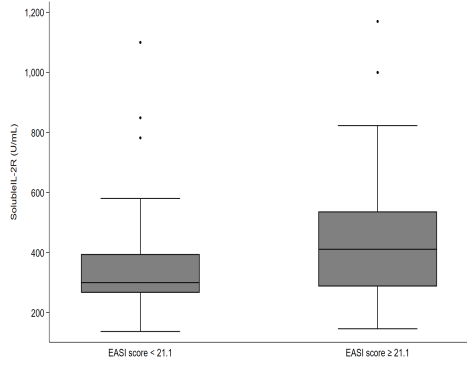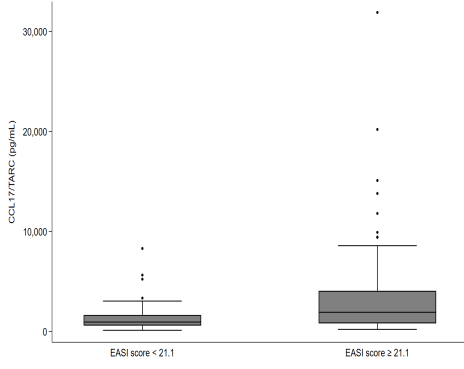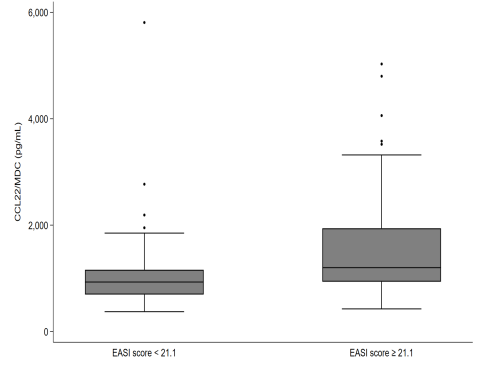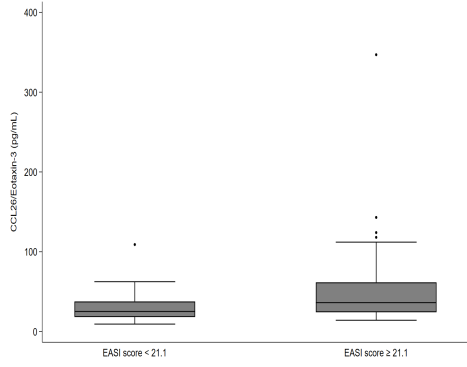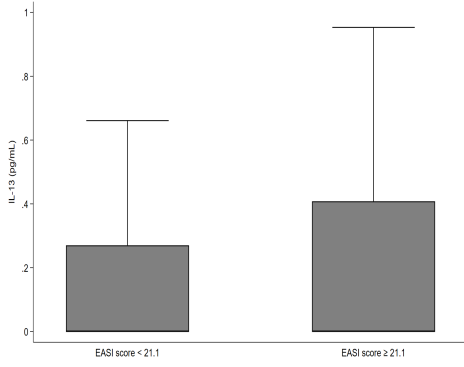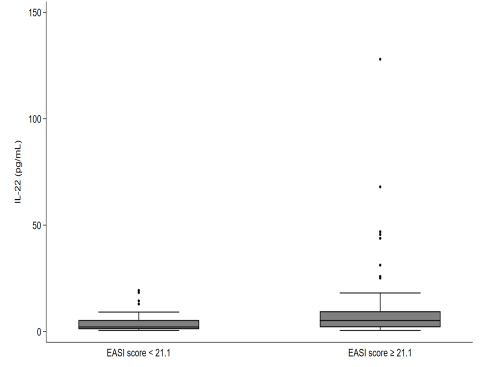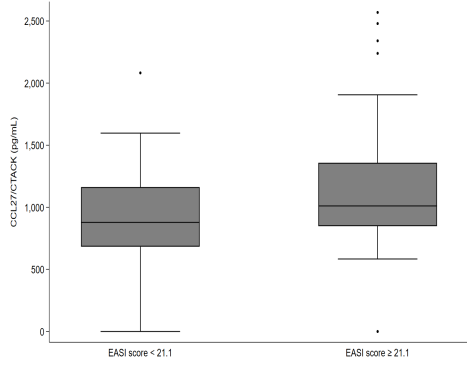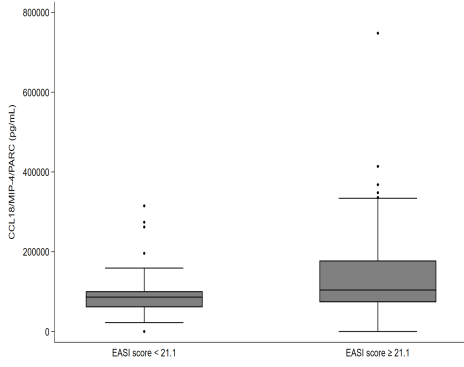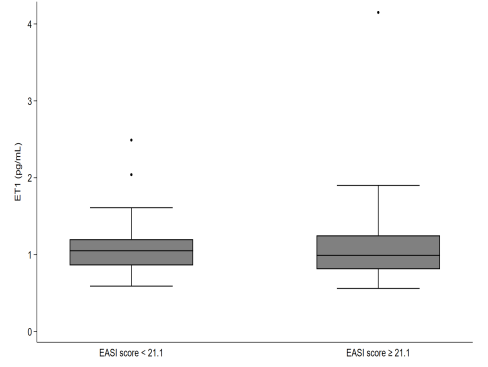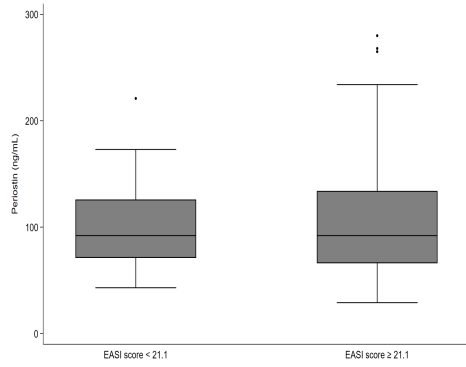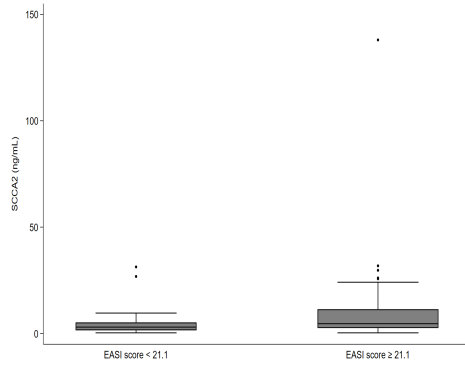

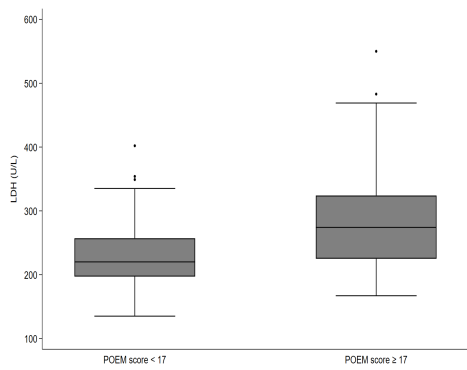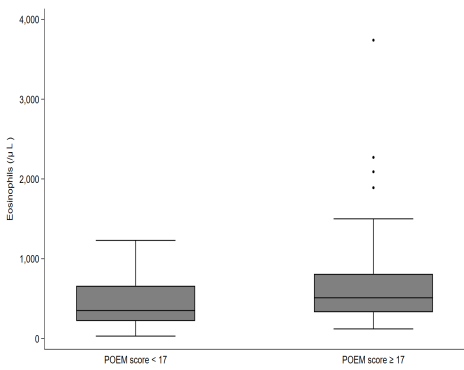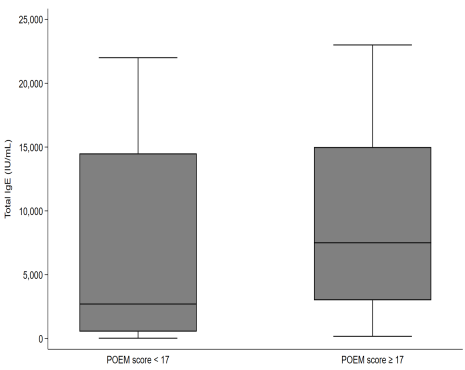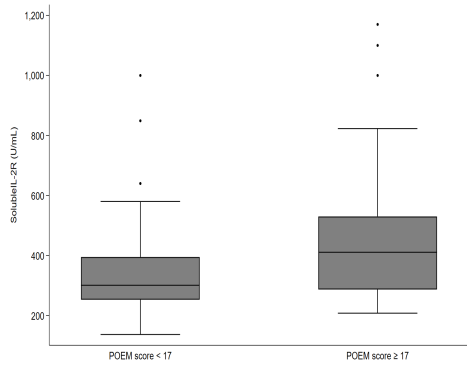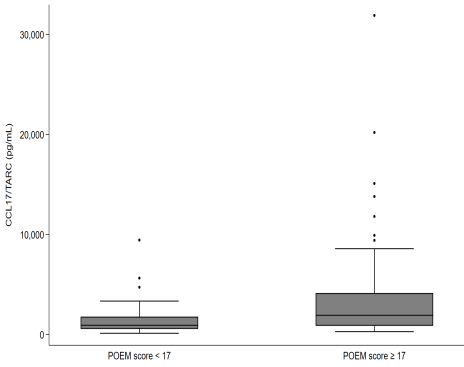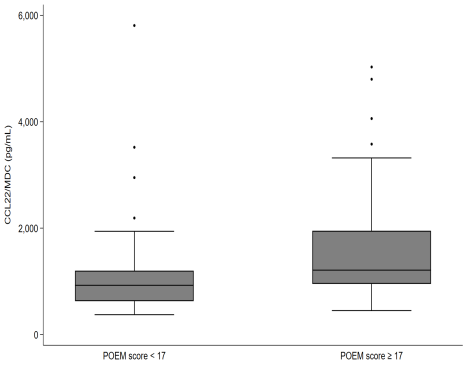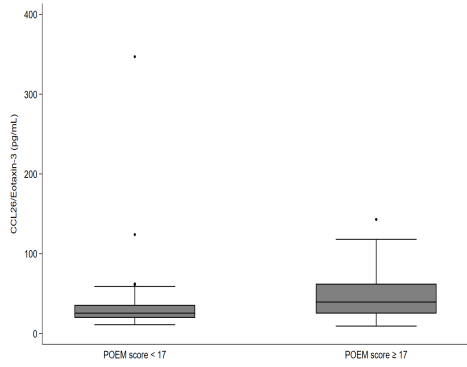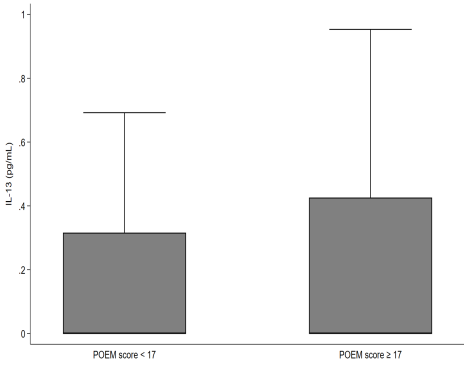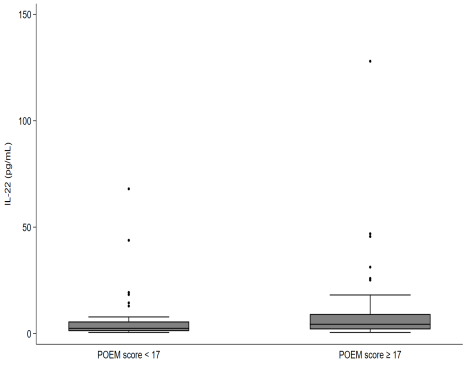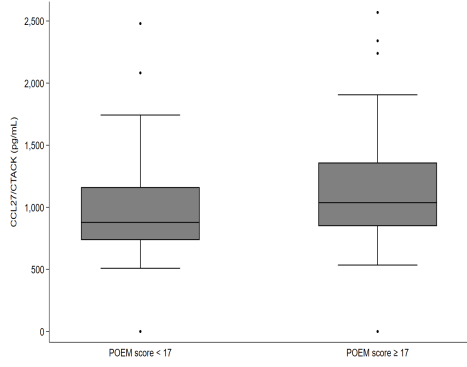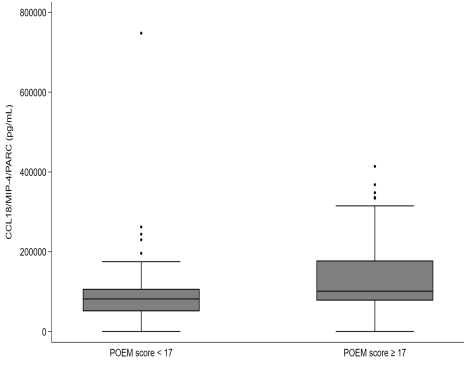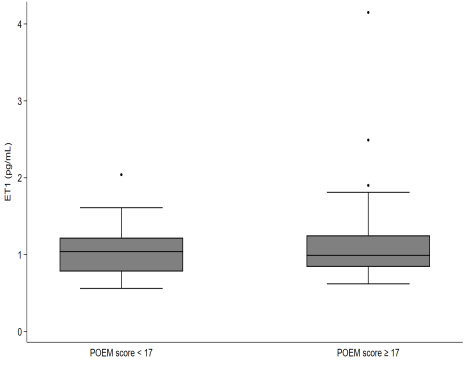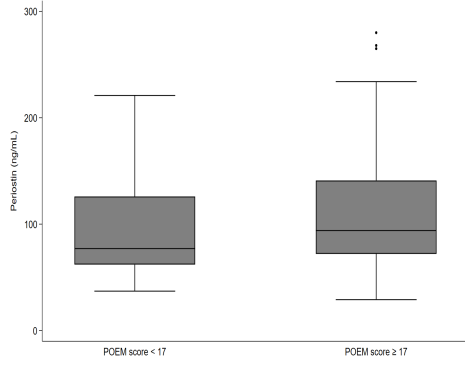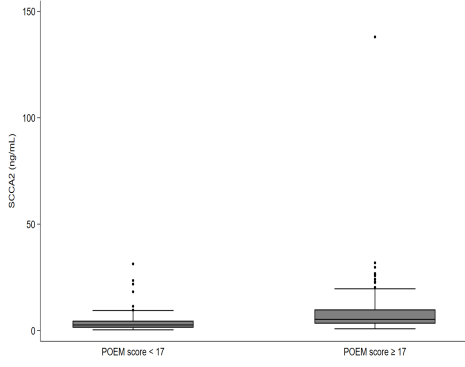

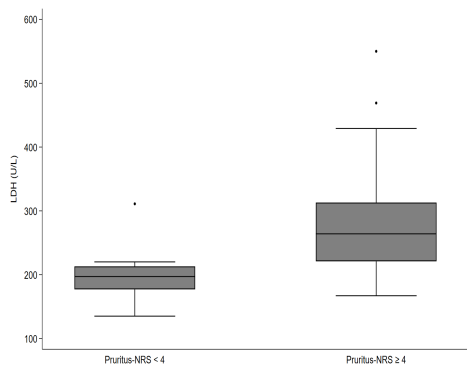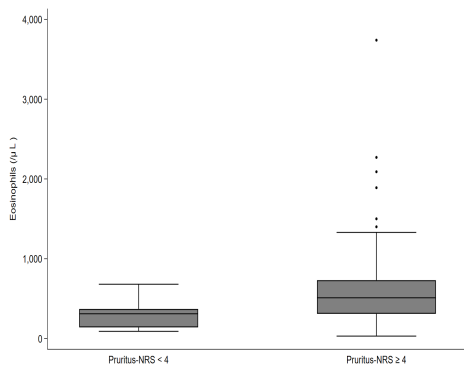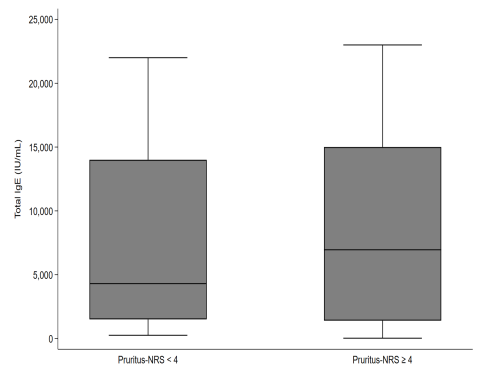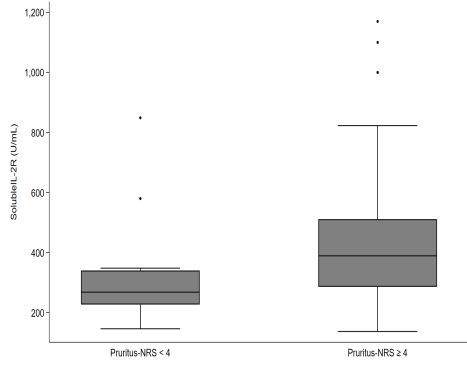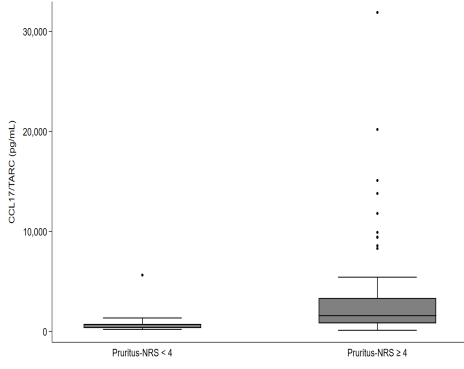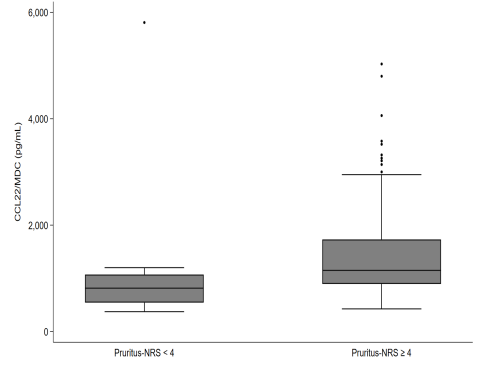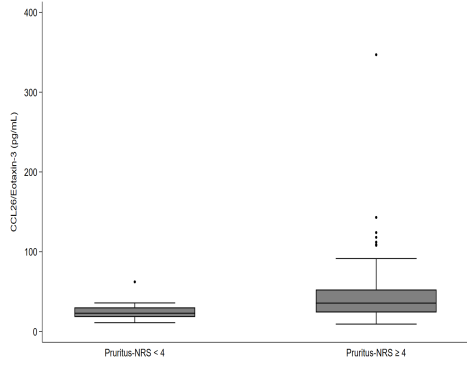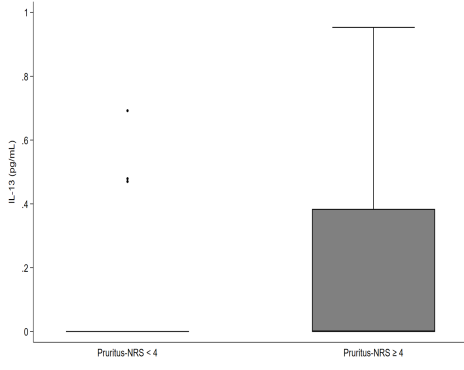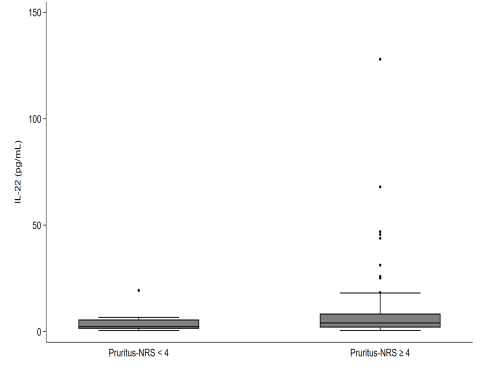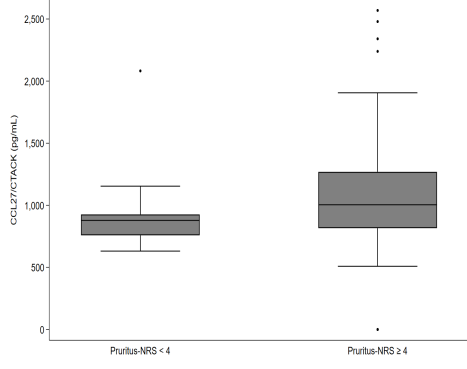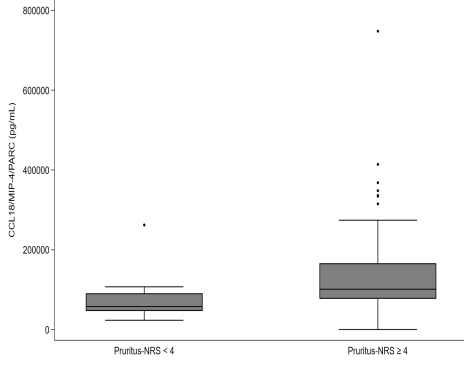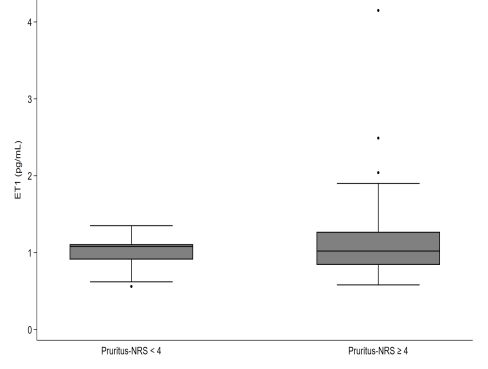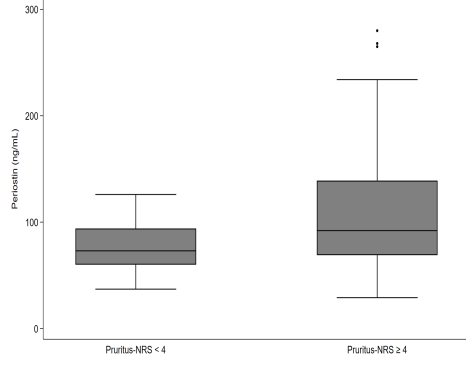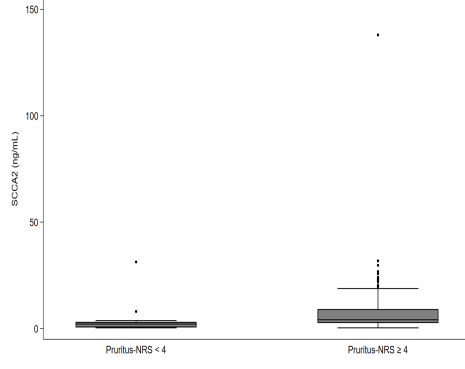

**A**

| <b>EASI score <math>\geq</math> 21.1 vs. EASI score <math>&lt;</math> 21.1</b> |       |
|--------------------------------------------------------------------------------|-------|
| Combination                                                                    | AUC   |
| SCCA2, Eosinophils , Total IgE, SolubleIL-2R , CCL17/TARC, CCL22/MDC           | 0.662 |
| SCCA2, Eosinophils , Total IgE, SolubleIL-2R , CCL17/TARC                      | 0.642 |
| SCCA2, Eosinophils , Total IgE, SolubleIL-2R                                   | 0.651 |
| SCCA2, Eosinophils , Total IgE                                                 | 0.674 |
| SCCA2, Eosinophils                                                             | 0.680 |

**B**

| <b>POEM score <math>\geq</math> 17 vs. POEM score <math>&lt;</math> 17</b> |       |
|----------------------------------------------------------------------------|-------|
| Combination                                                                | AUC   |
| LDH, IL-22                                                                 | 0.710 |

**C**

| <b>pruritis-NRS score <math>\geq</math> 4 vs. pruritis-NRS score <math>&lt;</math> 4</b> |       |
|------------------------------------------------------------------------------------------|-------|
| Combination                                                                              | AUC   |
| LDH, IL-22, CCL26/Eotaxin-3, CCL18/MIP-4/PARC                                            | 0.877 |
| LDH, IL-22, CCL26/Eotaxin-3                                                              | 0.867 |
| LDH, IL-22                                                                               | 0.858 |
